# Supplementary figures and images for: The Longitudinal Epidemiologic Assessment of Diabetes Risk (LEADR): Unique 1.4 M patient Electronic Health Record cohort
Source: PubMed Central journal article supplement — Healthc (Amst). Author manuscript; Available in PMC 2024 Apr 11. (PMC11008431; doi:10.1016/j.hjdsi.2020.100458), 2020-10-01

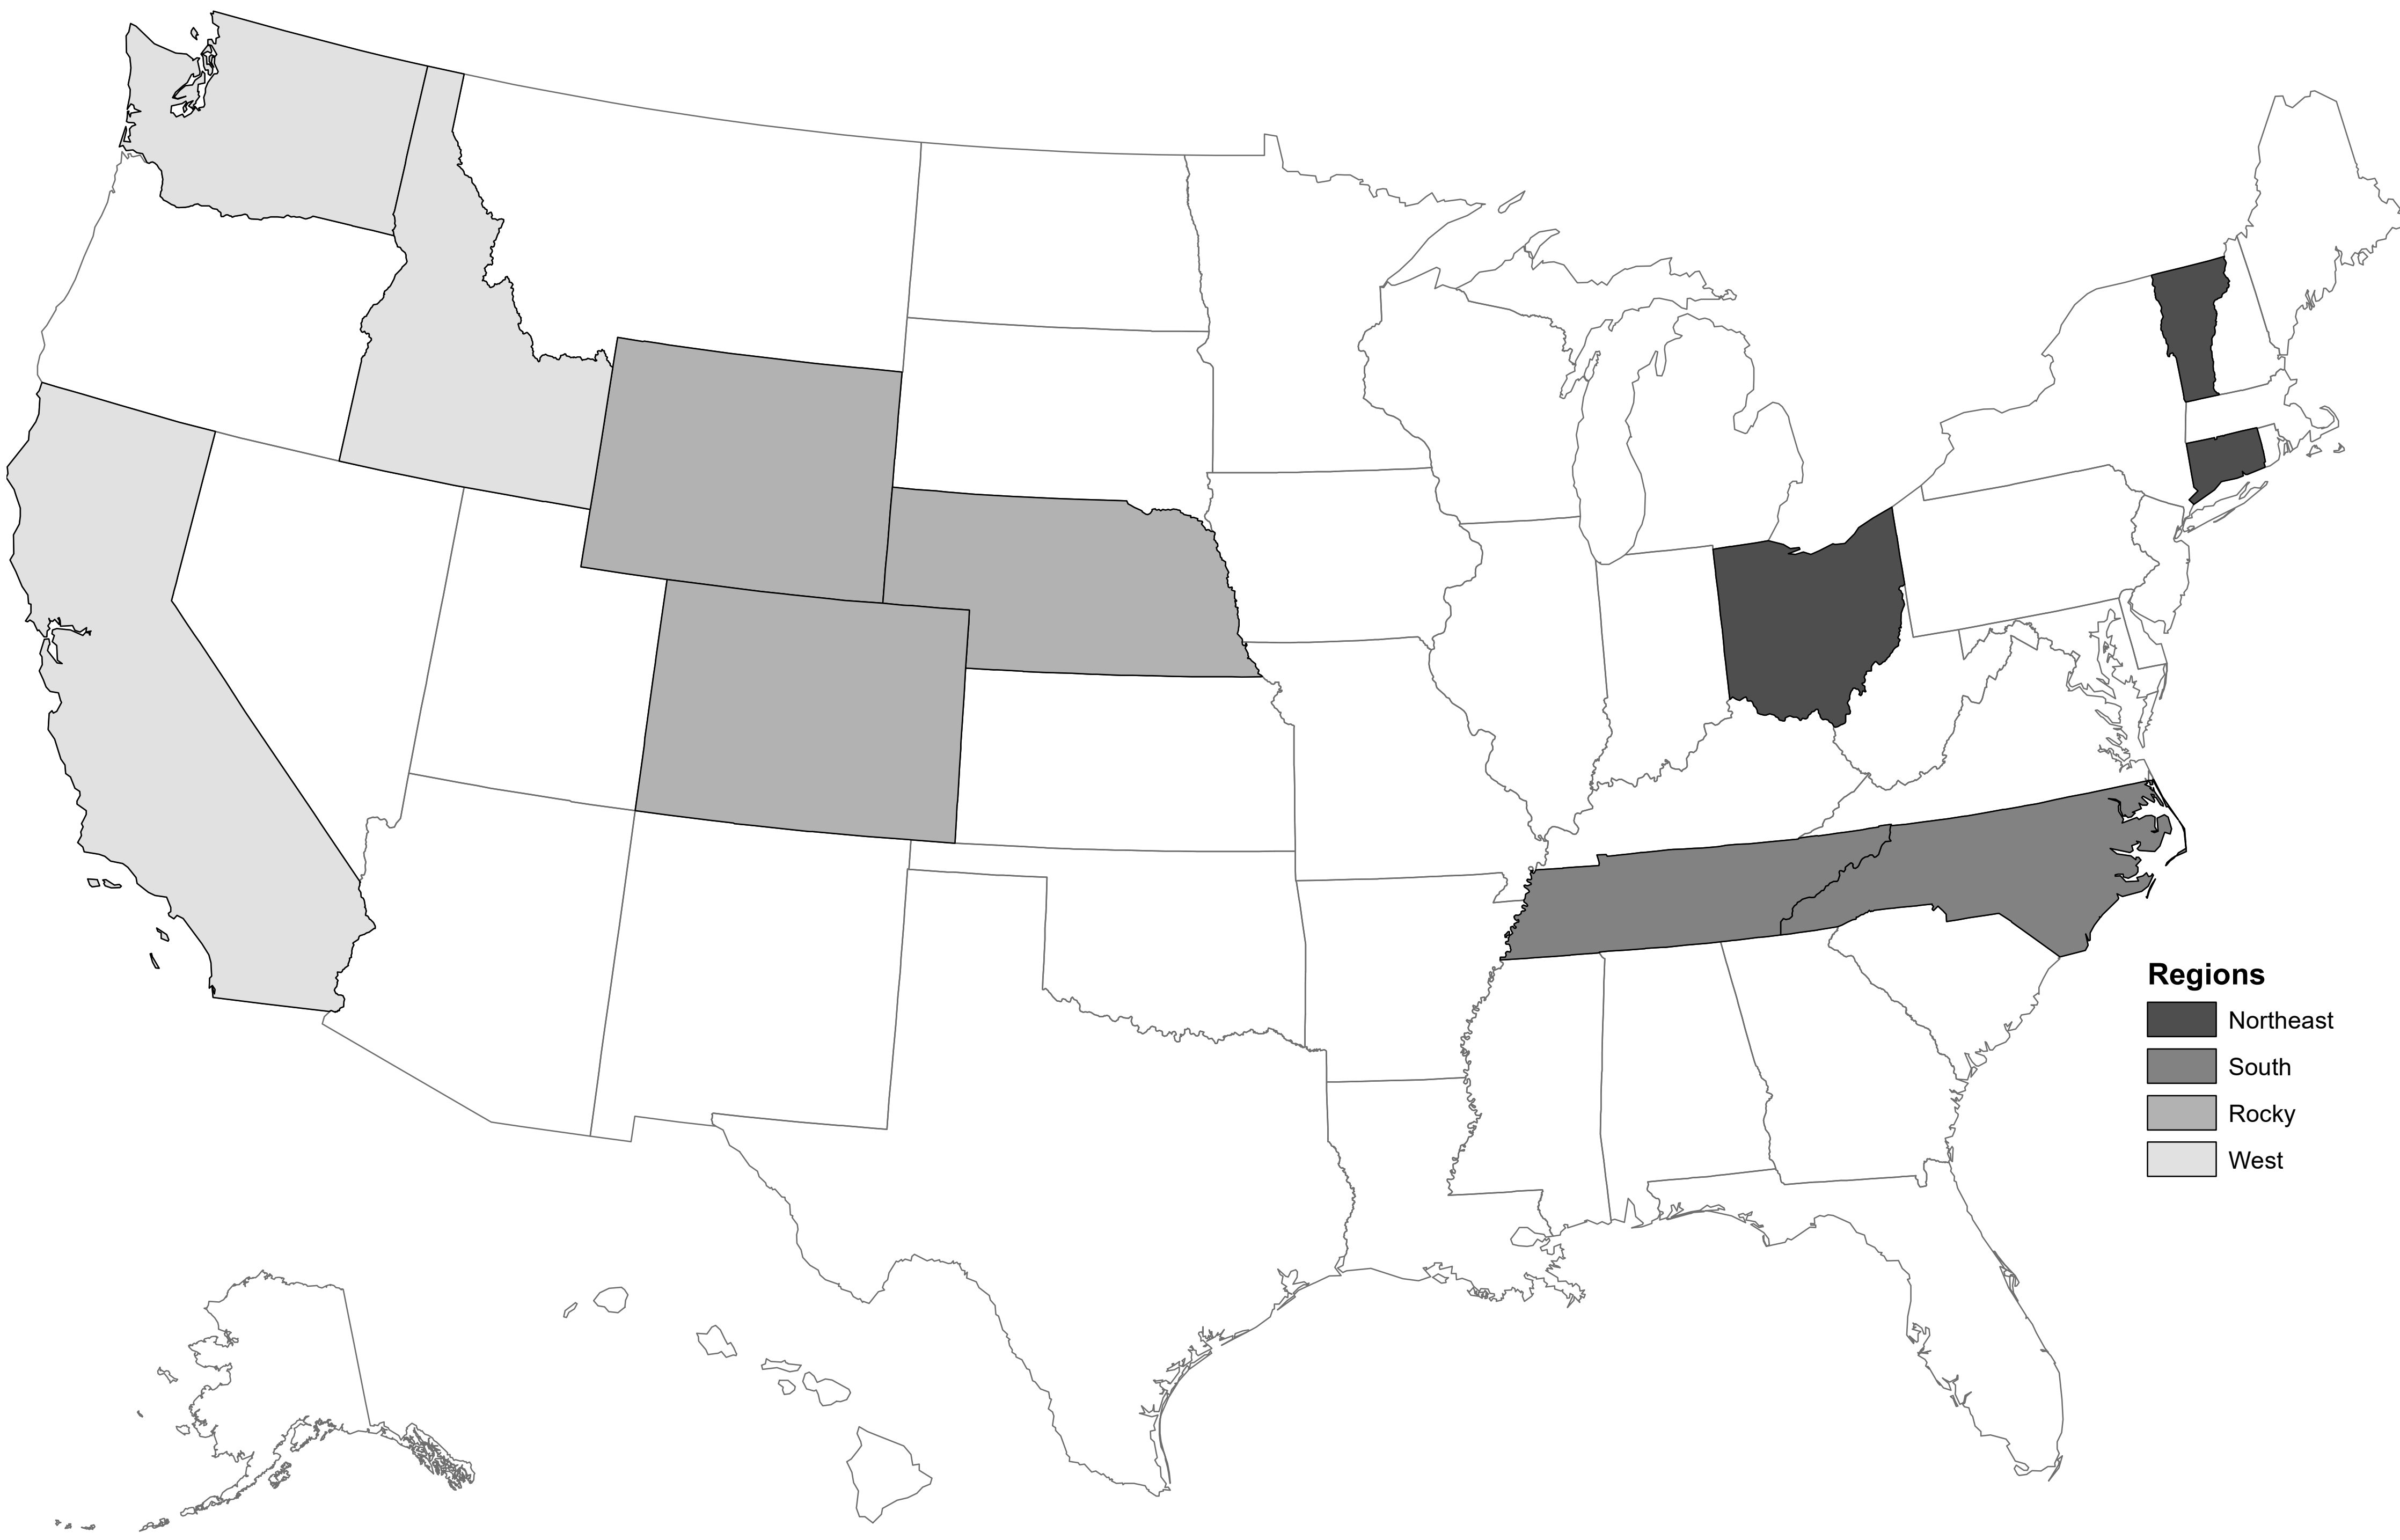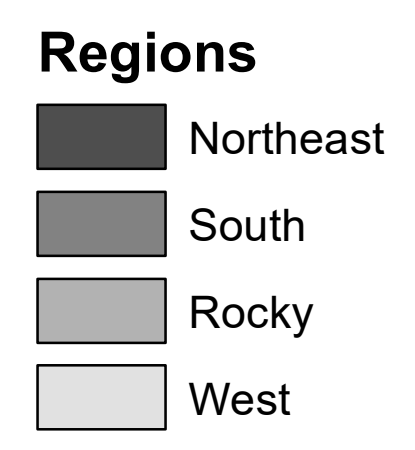

Supplement: NIHMS1979984-supplement-Suppl2.pdf [file NIHMS1979984-supplement-Suppl2.pdf]

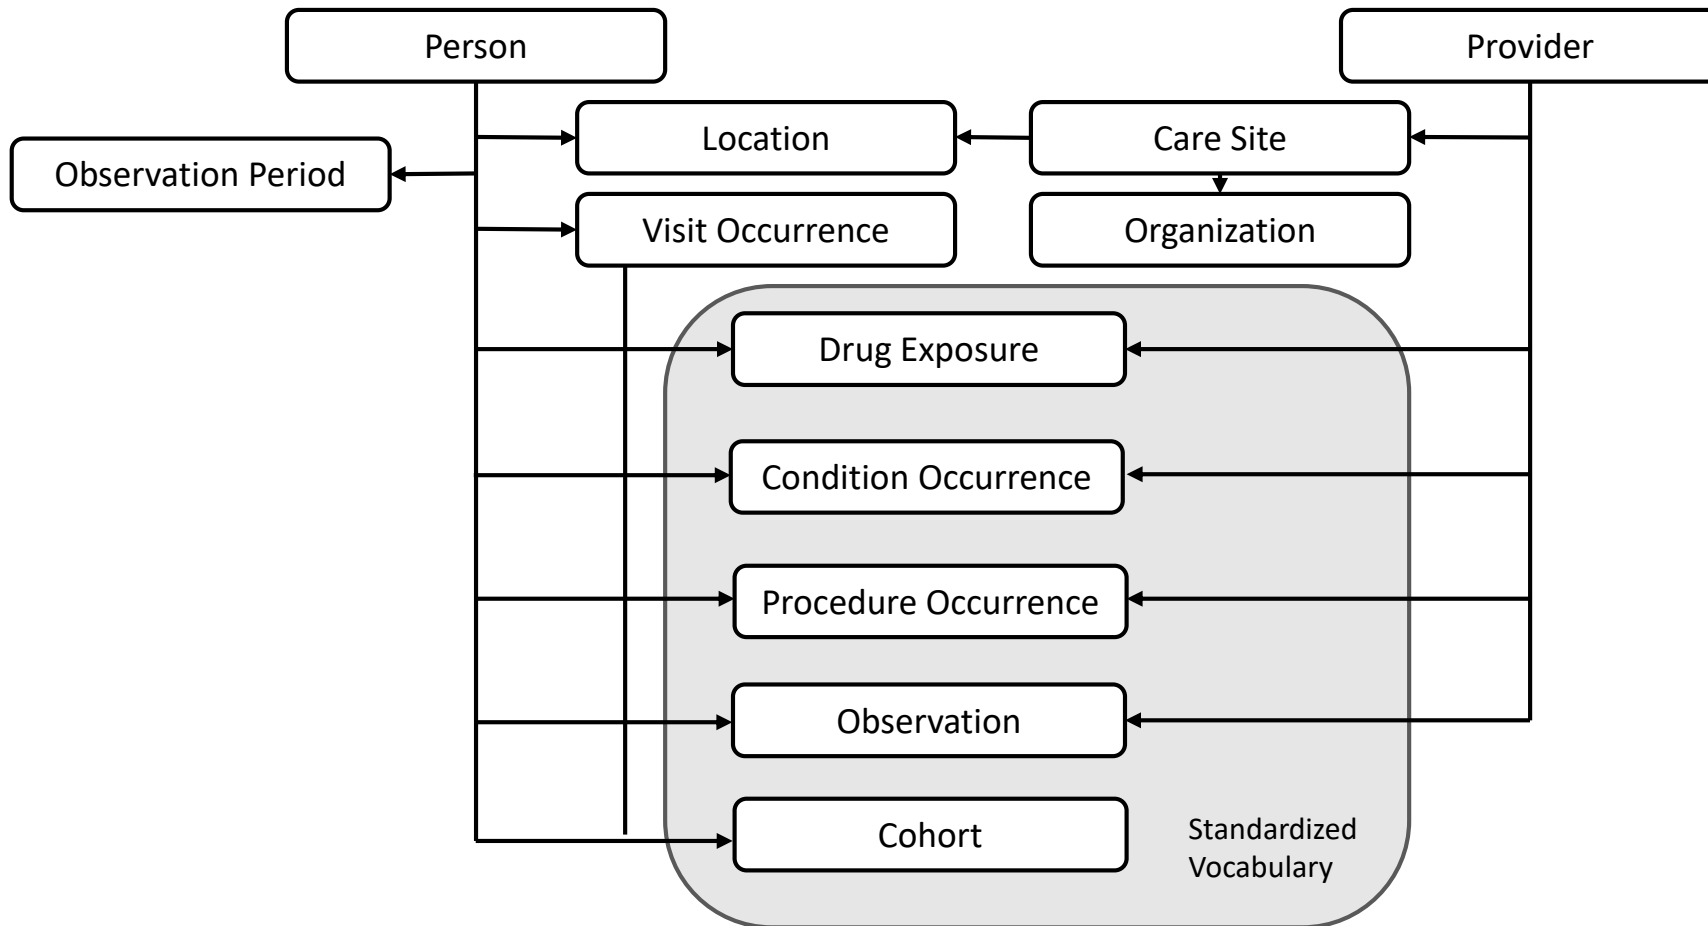

Supplement: NIHMS1979984-supplement-Suppl3.pdf [file NIHMS1979984-supplement-Suppl3.pdf]
